# Supplementary material for: Thermal conductivity and mechanical properties of a flake graphite/Cu composite with a silicon nano-layer on a graphite surface
Source: Royal Society of Chemistry journal article supplement (doi:10.1039/c6ra17804a), 2016-01-01
Supplement: c6ra17804a1.pdf [file c6ra17804a1.pdf]

## SUPPORTING INFORMATION

### Thermal conductivity and mechanical properties of flake graphite/Cu composite with a silicon nano-layer on graphite surface

Yingbin Zhu<sup>1</sup>, Hua Bai<sup>2\*</sup>, Chen Xue<sup>2</sup>, Rong Zhou<sup>1\*</sup>, Qunfeng Xu<sup>1</sup>, Pengfei Tao<sup>2</sup>, Chen Wang<sup>2</sup>, Junwei Wang<sup>2</sup>, Nan Jiang<sup>2\*</sup>

<sup>1</sup>Faculty of Materials Science and Engineering, Kunming University of Science and Technology, Kunming, Yunnan 650093, China.

<sup>2</sup>Key Laboratory of Marine Materials and Related Technologies, Zhejiang Key Laboratory of Marine Materials and Protective Technologies, Ningbo Institute of Materials Technology and Engineering, Chinese Academy of Sciences, Ningbo 315201, China.

\*Corresponding author,  
Email address: [baihua@nimte.ac.cn](mailto:baihua@nimte.ac.cn);  
[jiangnan@nimte.ac.cn](mailto:jiangnan@nimte.ac.cn)

[zhourongzyb@sina.com](mailto:zhourongzyb@sina.com);

#### SUPPLEMENT

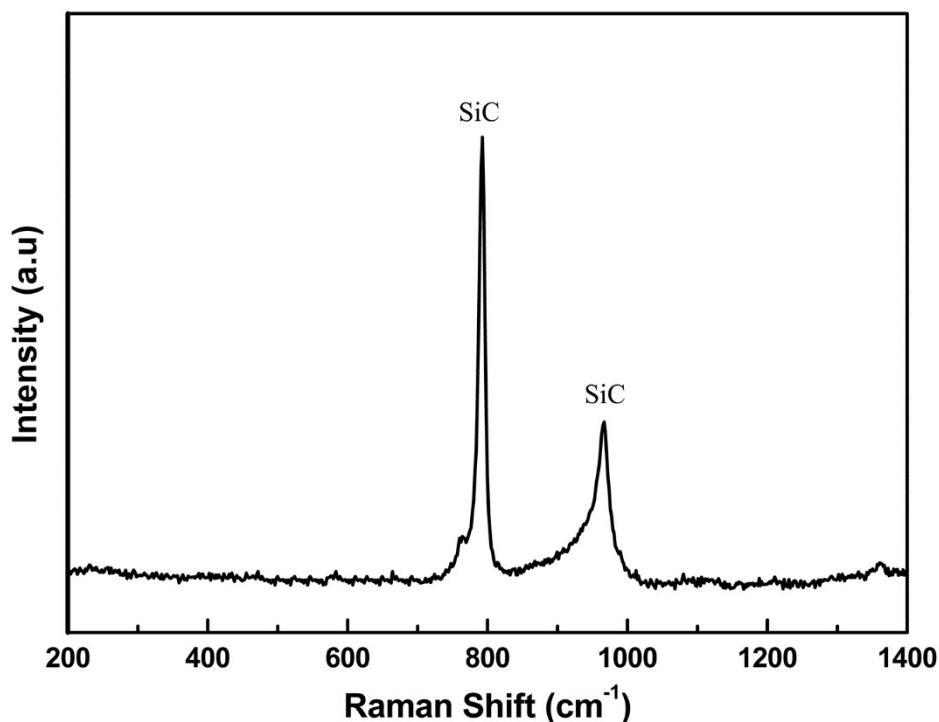

Fig. S1. Raman spectrum of the Si-coating grown on the surface of  $G_f$

The Raman spectra of the Si-coating grown on the  $G_f$  surface, as shown in Fig.

S1, help demonstrate the composition of the coated  $G_f$ . The Raman spectra were collected with a Renishaw Raman spectroscope (532 nm laser excitation wavelength). The main peaks are at 798 and 972  $\text{cm}^{-1}$ , corresponding to the optical phonon mode of  $\beta$ -SiC, which are nearly the same as the peaks reported by M. Bechelany et al.,<sup>1</sup> Peak1, located at 798  $\text{cm}^{-1}$ , has been attributed to the transverse optical phonon mode, while the peak located 972  $\text{cm}^{-1}$ , are assigned to the longitudinal optical phonon mode.

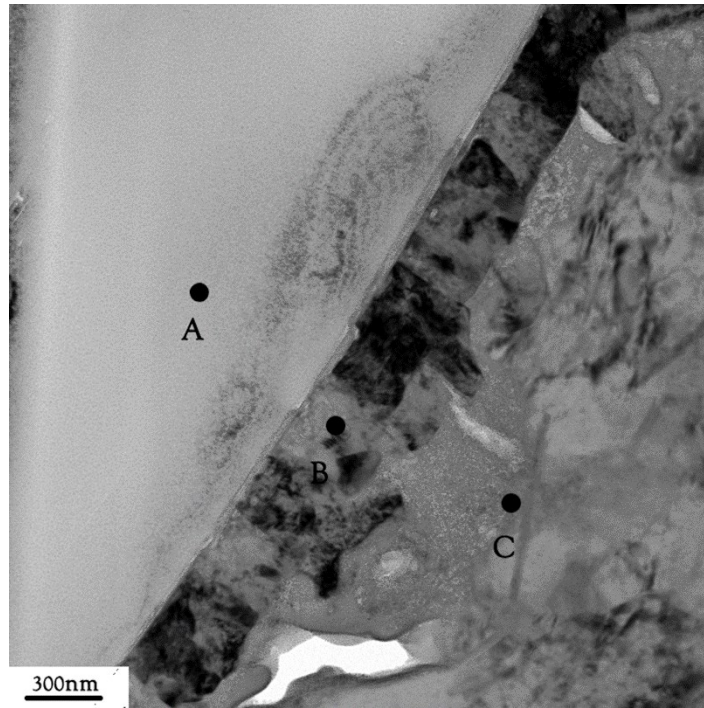

Fig. S2. An overview TEM bright-field (BF) image of the Si-coated  $G_f$ /Cu interface

In order to analyze the interface at a nanoscale, the composites were examined by TEM. Fig. S2 and the EDX results show 3 distinct areas: the regions A, B and C corresponding to the  $G_f$ , SiC interlayer and Cu matrix, respectively. The result show that the SiC coating still remain after sintering process, which is consistent with the XRD results of the composites.

---

<sup>1</sup> M. Bechelany, A.Brioude, D.Cornu, G.Ferro, P.Miele, A Raman spectroscopy study of individual SiC nanowires, *Adv.Funct.Mater.*17 (2007) 939–943.
